# Supplementary material for: Facile one-pot synthesis of biomass-derived activated carbon as an interlayer material for a BAC/PE/Al 2 O 3 dual coated separator in Li–S batteries
Source: Royal Society of Chemistry journal article supplement (doi:10.1039/d3ra05891c), 2023-01-01
Supplement: d3ra05891c1.pdf [file d3ra05891c1.pdf]

## Supporting Information

### Facile one-pot synthesis of biomass-derived activated carbon as an interlayer material for BAC/PE/Al<sub>2</sub>O<sub>3</sub> dual coated separator in Li-S batteries

Seongho Jo<sup>b,†</sup>, Jeong-Won Hong<sup>c,f,†</sup>, Toshiyuki Momma<sup>d</sup>, Yiseul Park<sup>f</sup>, Junyoung Heo<sup>c,e</sup>,  
Jun-woo Park<sup>c,e,\*\*</sup>, Seongki Ahn<sup>a,\*</sup>

a. Department of Chemical Engineering, Hankyong National University, 27, Jungang-ro,  
Anseong-si, Gyeonggi-do, Republic of Korea

b. Department of New Energy and Mining Engineering, Sangji University 83 Sangjidae-gil,  
Wonju-si, Gangwon-do, Republic of Korea.

c. Next-Generation Battery Research Center, Korea Electrotechnology Research Institute (KERI),  
12, Jeongiui-gil, Seongsan-gu, Chawon-si, Gyeongsangnam-do, Republic of Korea

d. Graduate School of Advanced Science and Engineering, Waseda University, Okubo,  
Shinjukuku, Tokyo, 169-8555, Japan

e. Department of Electro-Functionality Materials Engineering, University of Science and  
Technology (UST), Daejeon 34113, Republic of Korea.

f. Department of Chemical Engineering, Pukyong National University, Busan 48513, Republic  
of Korea.

\*Corresponding author: Assistant professor Seongki Ahn, Department of Chemical Engineering,  
Hankyong National University, 27, Jungang-ro, Anseong-si, Gyeonggi-do, Republic of Korea,

E-mail: skahn@hknu.ac.kr (S. Ahn)

\*\*Co-Corresponding author, E-mail: parkjw@keri.re.kr (J.-W. Park)

| Sample                                         | BC    | BAC-700 | BAC-800 | BAC-900 |
|------------------------------------------------|-------|---------|---------|---------|
| Surface Area (m <sup>2</sup> g <sup>-1</sup> ) | 0.673 | 2.597   | 12.324  | 571.611 |

**Table. S1** Surface area of BC and BAC powders depending on the activation temperature from 700 to 900 °C.

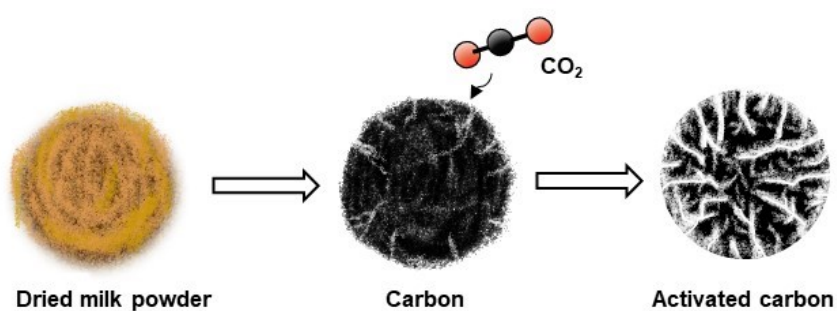

Figure S1. A schematic illustration of activation process by physical CO<sub>2</sub> activation.

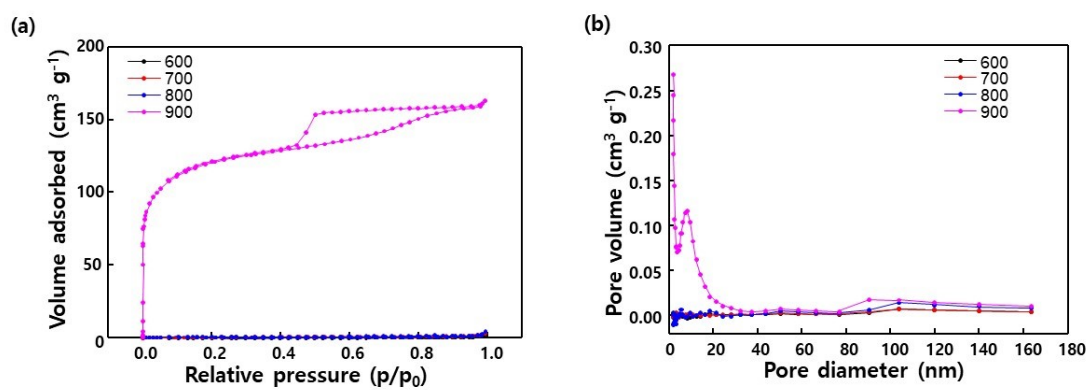

Figure S2. (a) BET isotherm and (b) BJH pore size distributions of BC and BAC.

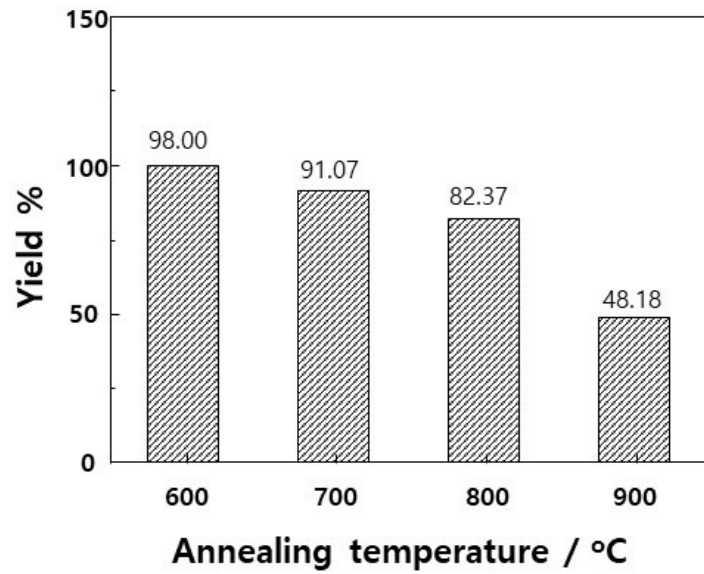

Figure S3. Yields of BAC powder by facile one-pot synthesis method at different activation temperature.

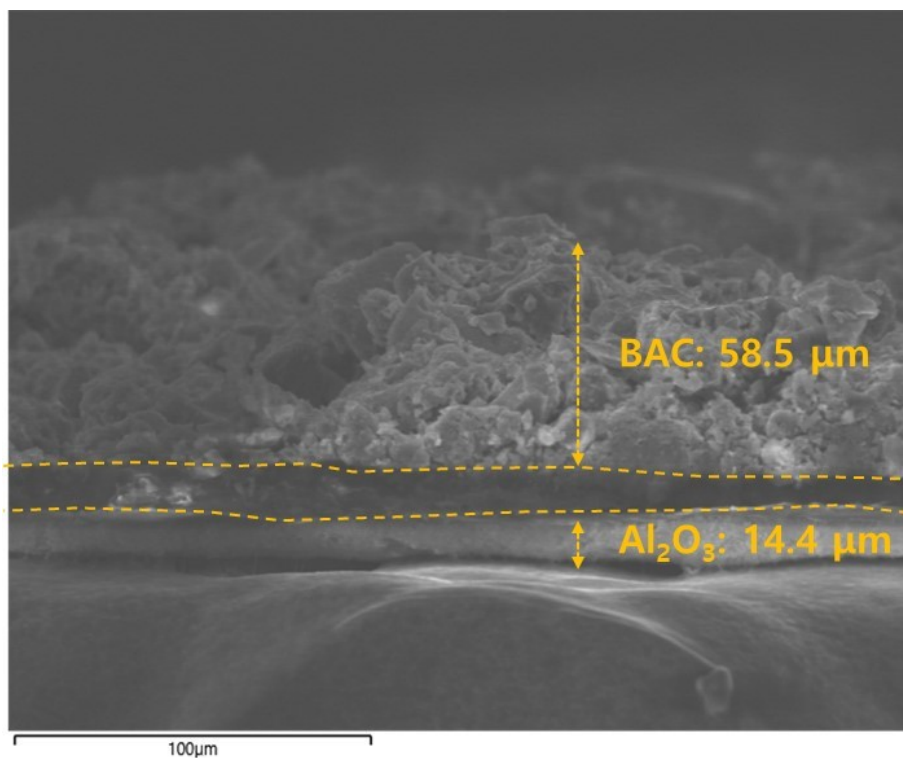

Figure S4. Cross-section SEM image of BAC/PE/ $\text{Al}_2\text{O}_3$  separator.

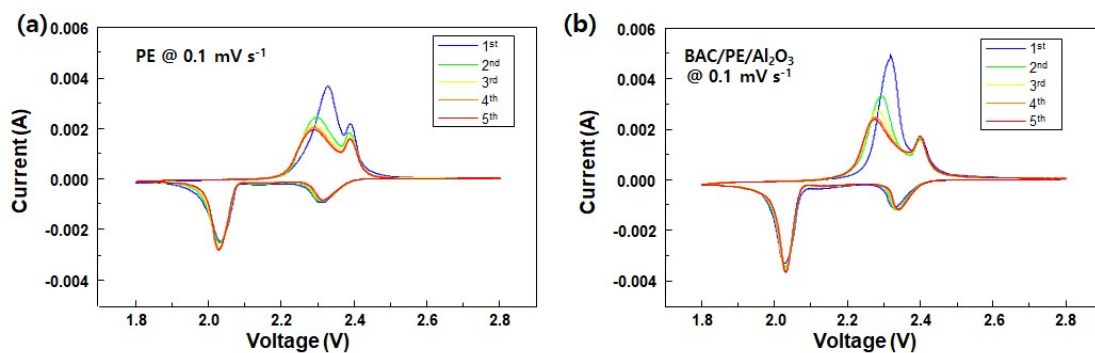

Figure S5. Cycle Voltammogram of samples prepared with PE (a) and BAC/PE/Al<sub>2</sub>O<sub>3</sub> separator (b) tested at 0.1 mV s<sup>-1</sup> for 5 cycles.

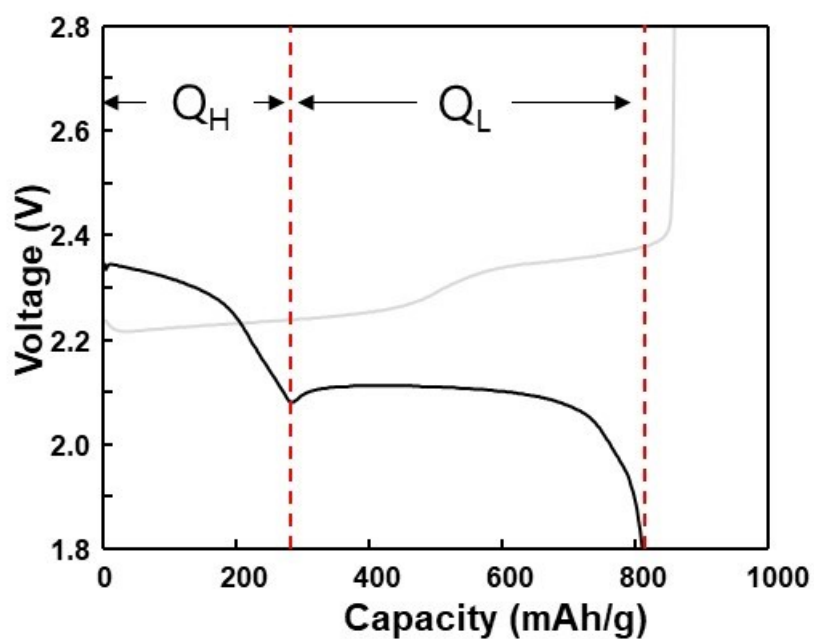

Figure S6. Charge and discharge curves of the Li-S coin-cell with Q<sub>H</sub> and Q<sub>L</sub> region.

**Table S2.**  $Q_H$ ,  $Q_L$ , and  $Q_L/Q_H$  ratio values of both samples.

| Cycle | PE    |       |           | BAC/PE/Al <sub>2</sub> O <sub>3</sub> |       |           |
|-------|-------|-------|-----------|---------------------------------------|-------|-----------|
|       | $Q_H$ | $Q_L$ | $Q_L/Q_H$ | $Q_H$                                 | $Q_L$ | $Q_L/Q_H$ |
| 5     | 153   | 360   | 2.35      | 211                                   | 550   | 2.61      |
| 20    | 129   | 272   | 2.11      | 205                                   | 504   | 2.46      |
| 50    | 114   | 245   | 2.15      | 182                                   | 448   | 2.46      |
| 100   | 124   | 262   | 2.11      | 142                                   | 353   | 2.49      |

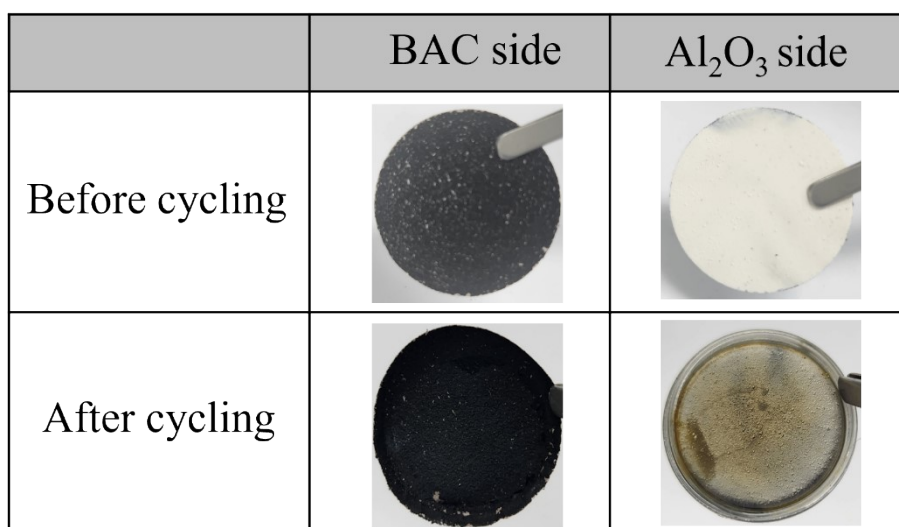

Figure S7. Morphology of BAC/PE/Al<sub>2</sub>O<sub>3</sub> separators before and after charge/discharge process.

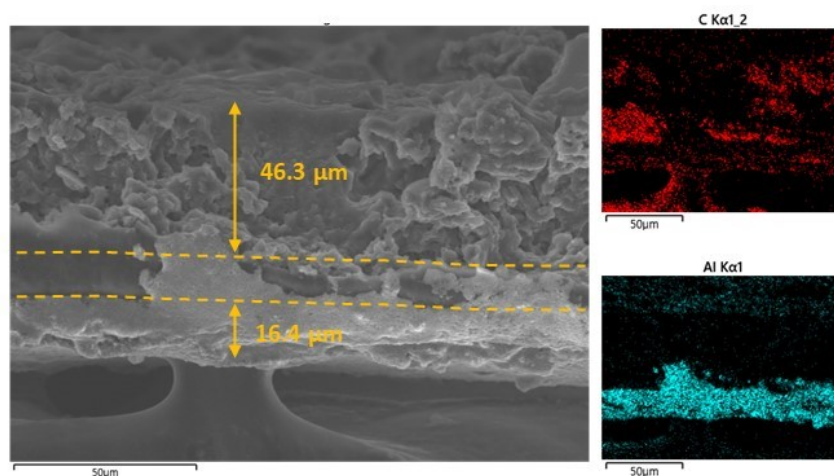

Figure S8. Cross-section SEM image and EDS mapping of BAC/PE/Al<sub>2</sub>O<sub>3</sub> separators after charge/discharge process.
